# Supplementary material
Source: PubMed Central journal article supplement (PMC5503131)

**a**

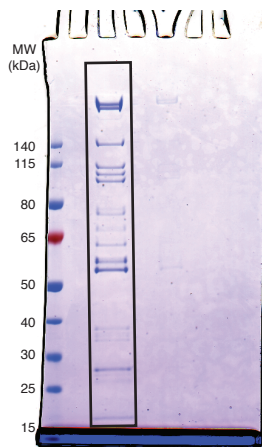

**b**

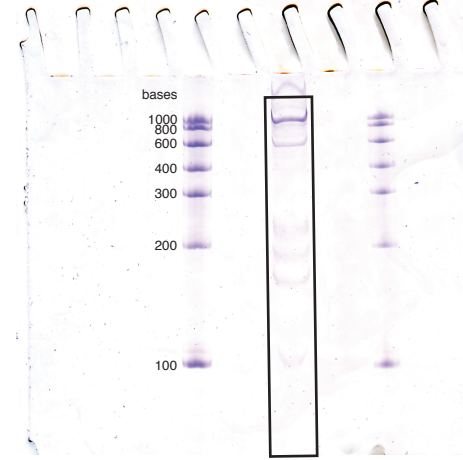

**c**

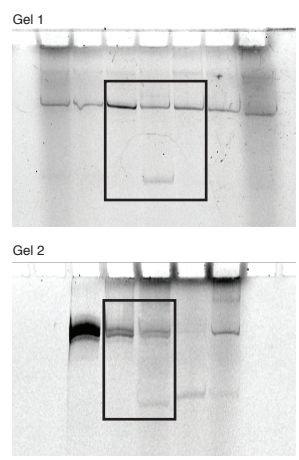

Supplement: NIHMS72630-supplement-Supplementary_Information.pdf [file NIHMS72630-supplement-Supplementary_Information.pdf]
